# Supplementary material for: Alginic acid: a highly efficient renewable and heterogeneous biopolymeric catalyst for one-pot synthesis of the Hantzsch 1,4-dihydropyridines
Source: Royal Society of Chemistry journal article supplement (doi:10.1039/c4ra11801d), 2014-01-01
Supplement: c4ra11801d1.pdf [file c4ra11801d1.pdf]

## Electronic Supplementary Information for RSC Advances

# Alginate acid: a highly efficient renewable and heterogeneous bio-polymeric catalyst for one-pot synthesis of the Hantzsch 1,4-dihydropyridines

Mohammad G. Dekamin,\* Siamand Ilkhanizadeh, Zahra Latifidoost, Hamed Daemi, Zahra Karimi and Mehdi Barikani

| Contents                                                                                                                                                                         | Page |
|----------------------------------------------------------------------------------------------------------------------------------------------------------------------------------|------|
| 1. Experimental section                                                                                                                                                          | 2    |
| 1.1. Materials and methods                                                                                                                                                       | 2    |
| 1.2. General procedure for fractionation of sodium alginate to its components                                                                                                    | 2    |
| 1.3. General procedure for preparation of alginate acid ( <b>1</b> ) from sodium alginate                                                                                        | 2    |
| 1.4. Chemical characterization of sodium alginate                                                                                                                                | 9    |
| 1.5. Thermo-Gravimetric analysis of sodium alginate and alginate acid ( <b>1</b> )                                                                                               | 10   |
| 1.6. Chemical characterization of alginate acid ( <b>1</b> )                                                                                                                     | 11   |
| 1.7. General procedure for the synthesis of 1,4-dihydropyridines ( <b>5-6</b> ) catalyzed by alginate acid ( <b>1</b> )                                                          | 12   |
| 1.8. Reusability of alginate acid catalyst ( <b>1</b> ) for the Hantzsch MCR                                                                                                     | 12   |
| Table 1. Pseudo-four-component synthesis of different diethyl 1,4-DHP-3,5-dicarboxylate ( <b>5a-p</b> ) catalysed by alginate acid ( <b>1</b> ) in EtOH under reflux conditions  | 13   |
| Table 2. Pseudo-four-component synthesis of different dimethyl 1,4-DHP-3,5-dicarboxylate ( <b>6a-p</b> ) catalysed by alginate acid ( <b>1</b> ) in EtOH under reflux conditions | 15   |
| Chemical characterization of diethyl 1,4-dihydro-2,6-dimethyl-4-(thiophen-2-yl)pyridine-3,5-dicarboxylate ( <b>5o</b> )                                                          | 17   |
| Chemical characterization of diethyl 2,6-dimethyl-4-styrylpyridine-1,4-dihydro-3,5-dicarboxylate ( <b>5p</b> )                                                                   | 22   |
| Chemical characterization of dimethyl 4-(4-chlorophenyl)-2,6-dimethyl-1,4-dihydropyridine-3,5-dicarboxylate ( <b>6b</b> )                                                        | 26   |

# 1. Experimental section

## 1.1. Materials and methods

Melting points were determined using an Electrothermal apparatus. The FTIR spectra of alginate and its derivatives were performed with a Bruker-Equinox 55 IR spectrometer (Ettlingen, Germany) which was equipped by H.ATR accessories with a ZnSe crystal. Moreover, FTIR spectra of 1,4-dihydropyridines were recorded as KBr pellets on a Shimadzu FT IR-8400S spectrometer. The  $^1\text{H}$  NMR and  $^{13}\text{C}$  NMR spectra of 1,4-dihydropyridines and sodium alginate were recorded in deuterated chloroform ( $\text{CDCl}_3$ ) and  $\text{D}_2\text{O}$  using spectrometers of Bruker Avance (250 MHz and 400 MHz), respectively. Analytical TLC was carried out using Merck 0.2 mm silica gel 60 F-254 Al-plates. Thermal stability of the sodium alginate and alginic acid were evaluated by the TGA technique on a Polymer Lab TGA-1500 instrument (London) under a  $\text{N}_2$  atmosphere from room temperature to 600 °C with a heating rate of 10 °C/min.

## 1.2. General procedure for the fractionation of sodium alginate to its components

Sodium alginate was partially hydrolyzed according to the controlled gellification method. 1.0 gram of polysaccharide was dissolved in 100 mL of deionized water at 50 °C and heated under reflux conditions with 3 mL of HCl (3 M) for 20 min. After cooling to room temperature, the suspension was centrifuged (3000×g, 20 min) and the insoluble fraction from the centrifugation was refluxed in 100 mL of HCl (0.3 M) for 2 h. After centrifugation (8500×g, 20 min), the insoluble material was neutralized with NaOH (1 M) and the pH was adjusted to 2.85 with HCl (1 M). The soluble fraction was neutralized and added to 100 mL of EtOH. The precipitate was collected by centrifugation (8500×g, 20 min) and dried at 50 °C *in vacuo* for 12 h (block M). The fractions obtained in the first hydrolysis step with HCl (0.3 M) and the soluble fraction at second step at pH 2.85 were rich of heteropolymeric MG and polymannuronic acid residues, respectively. Finally, the insoluble fraction at pH 2.85 was attributed to the polyguluronic acid residues.

## 1.3. General procedure for preparation of alginic acid (1) from sodium alginate

Alginic acid was synthesized through a procedure described by Babak et al., with some modifications. Sodium alginate (4.0 g) was added to a mixture of HCl (0.6 N, 50 mL) and EtOH (40 mL) and stirred overnight at 4 °C. The solid fraction, alginic acid, was separated by filtration under vacuum using a coarse filter paper. Then, the alginic acid was purified by washing with EtOH and acetone and dried in the oven at 60 °C.

**References:** (a) F. Llanes, F. Sauriol, F. G. Morin, A. S. Perlin, *Can. J. Chem.* **1997**, *75*, 585–590; (b) T. M. Aida, T. Yamagata, M. Watanabe, R. L. Smith Jr, *Carbohydr. Polym.* **2010**, *80*, 296–302; (c) T. A. Fenoradosoa, G. Ali, C. Delattre, C. Laroche, E. Petit, A. Wadouachi, P. Michaud, *J. Appl. Phycol.* **2010**, *22*, 131–137; (d) S. Holtan, Q. Zhang, W. I. Strand, G. Skjåk-Bræk, *Biomacromolecules*, **2006**, *7*, 2108–2121, (e) H. Daemi, M. Barikani, *Sci. Iran.* **2012**, *19*, 2023–2028; (f) V. G. Babak, E. A. Skotnikova, I. G. Lukina, S. Pelletier, P. Hubert, E. J. Dellacherie, *J. Colloid. Interface Sci.* **2000**, *225*, 505–510; (g) H. Daemi, M. Barikani, M. Barmar, *Int. J. Biol. Macromol.* **2014**, *66*, 212–220.

## 1.4. Chemical characterization of sodium alginate

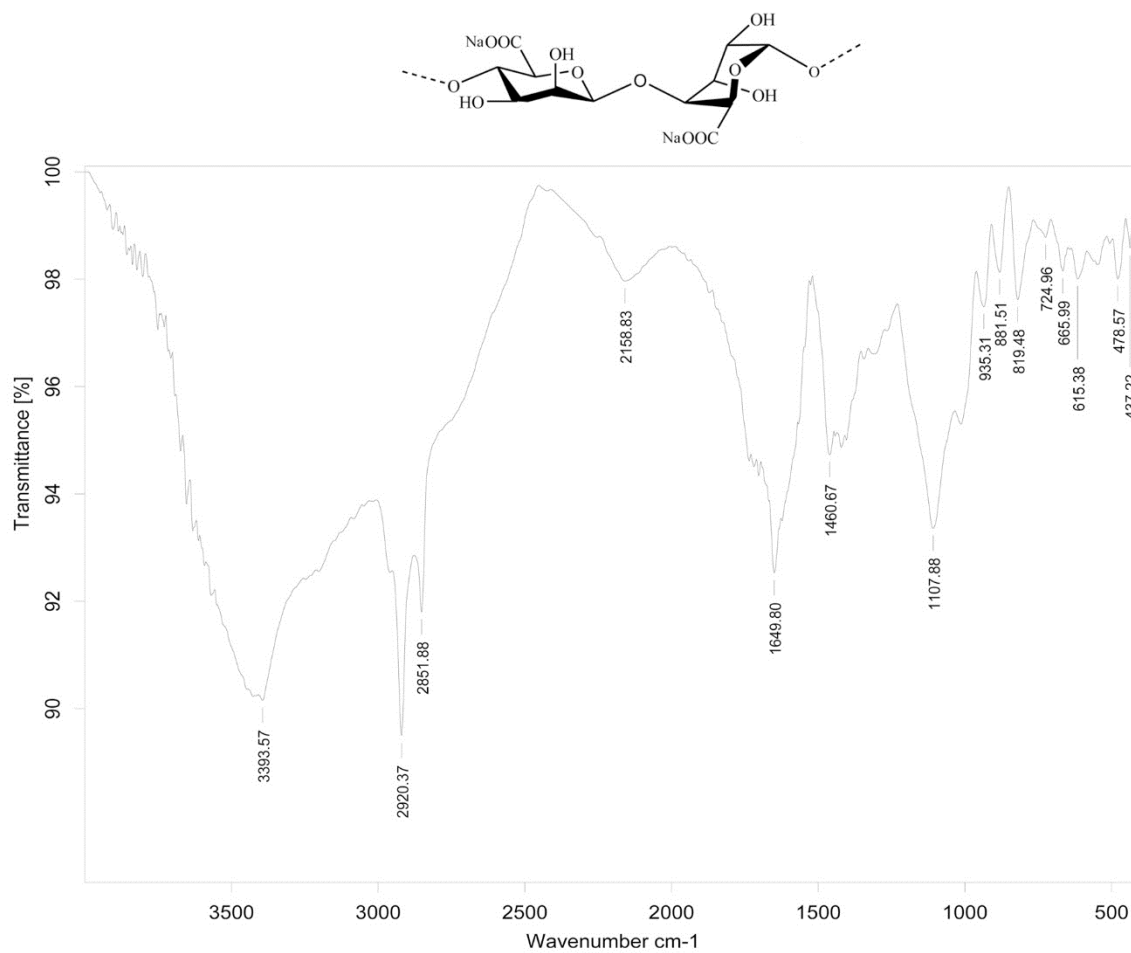

Fig. 1. FT-IR spectrum of the commercial sodium alginate.

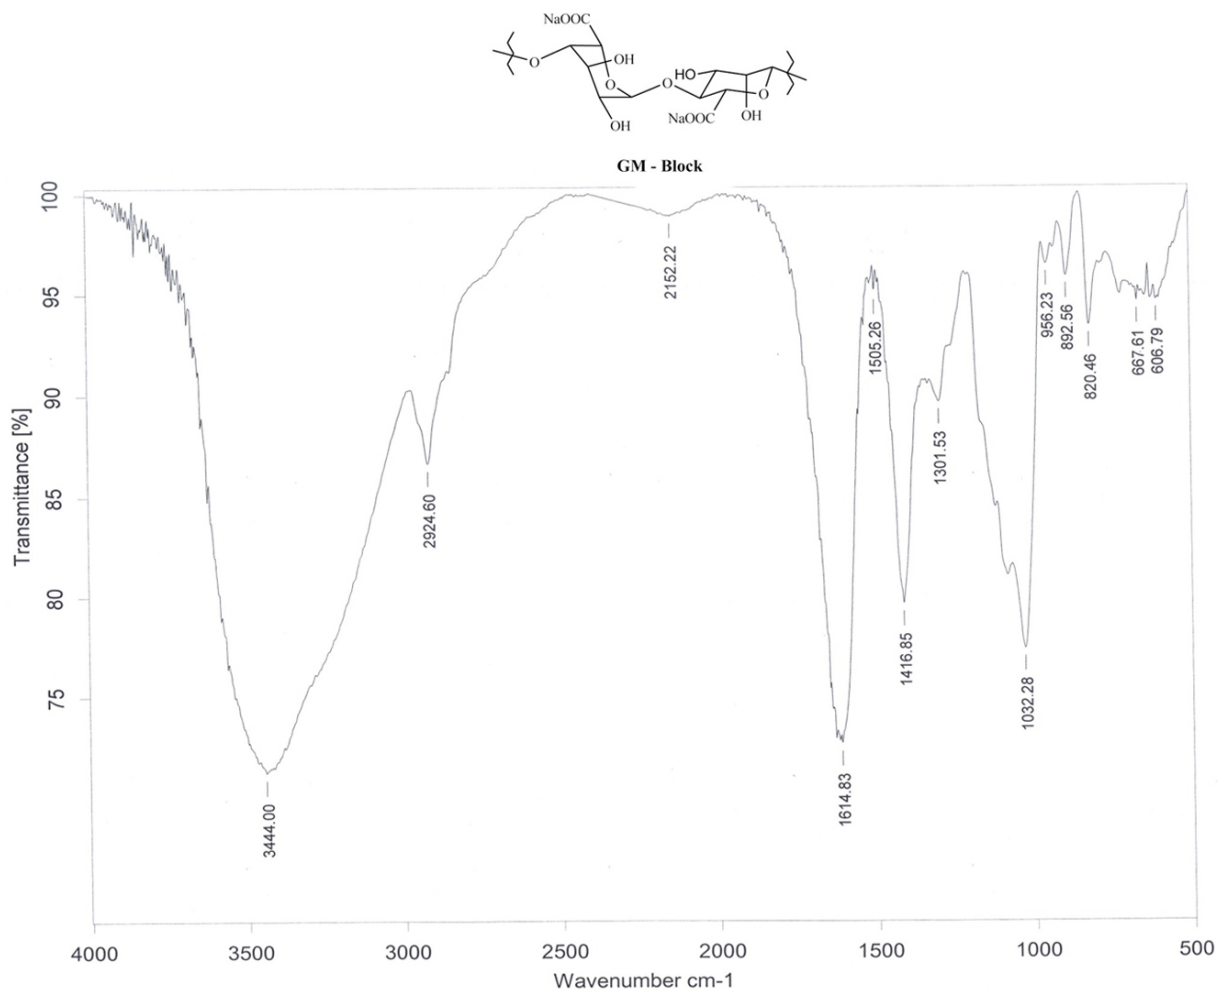

Fig. 2. FT-IR spectrum of the heterogenous copolymer containing random M and G blocks.

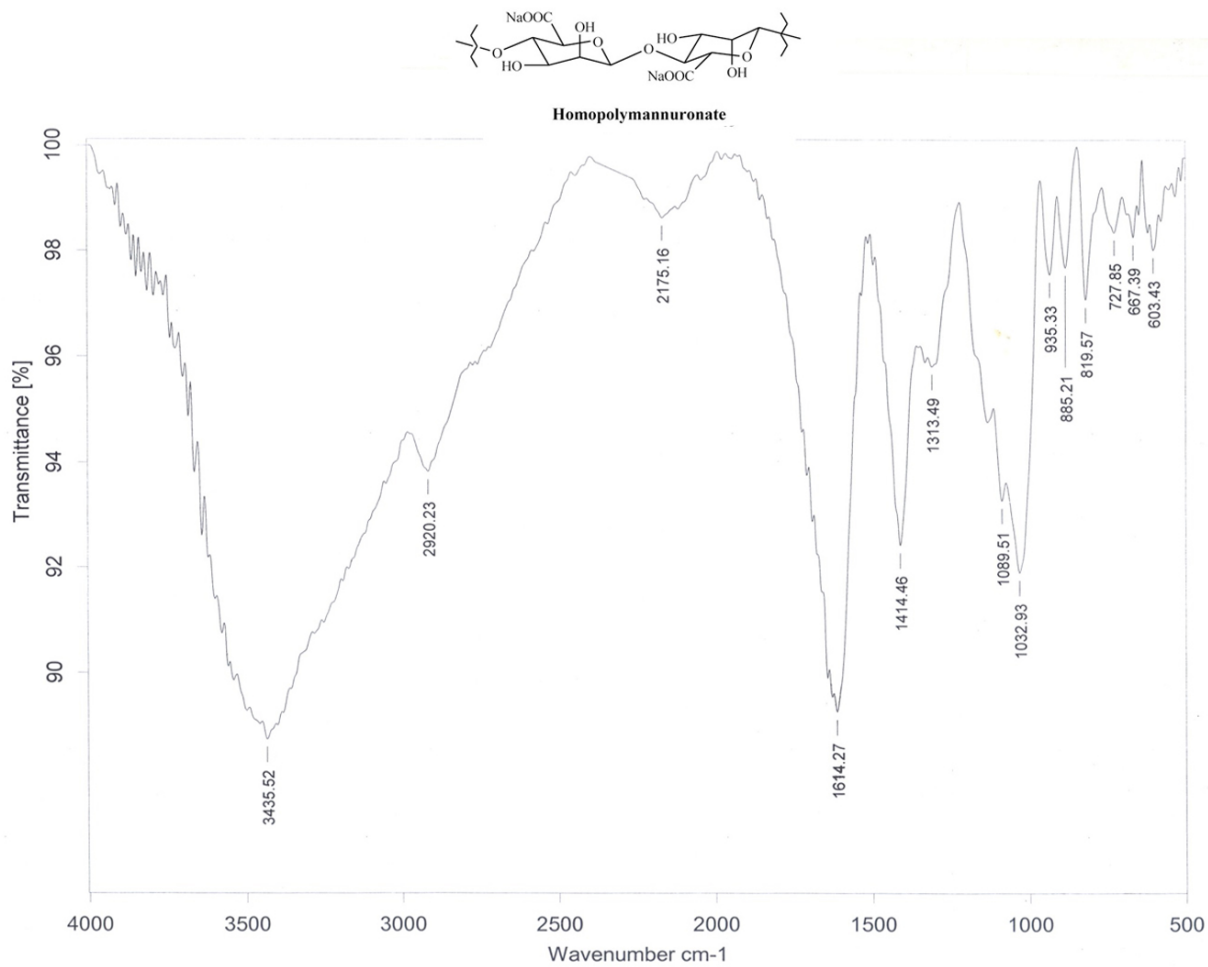

Fig. 3. FT-IR spectrum of the sodium homopolymannuronate.

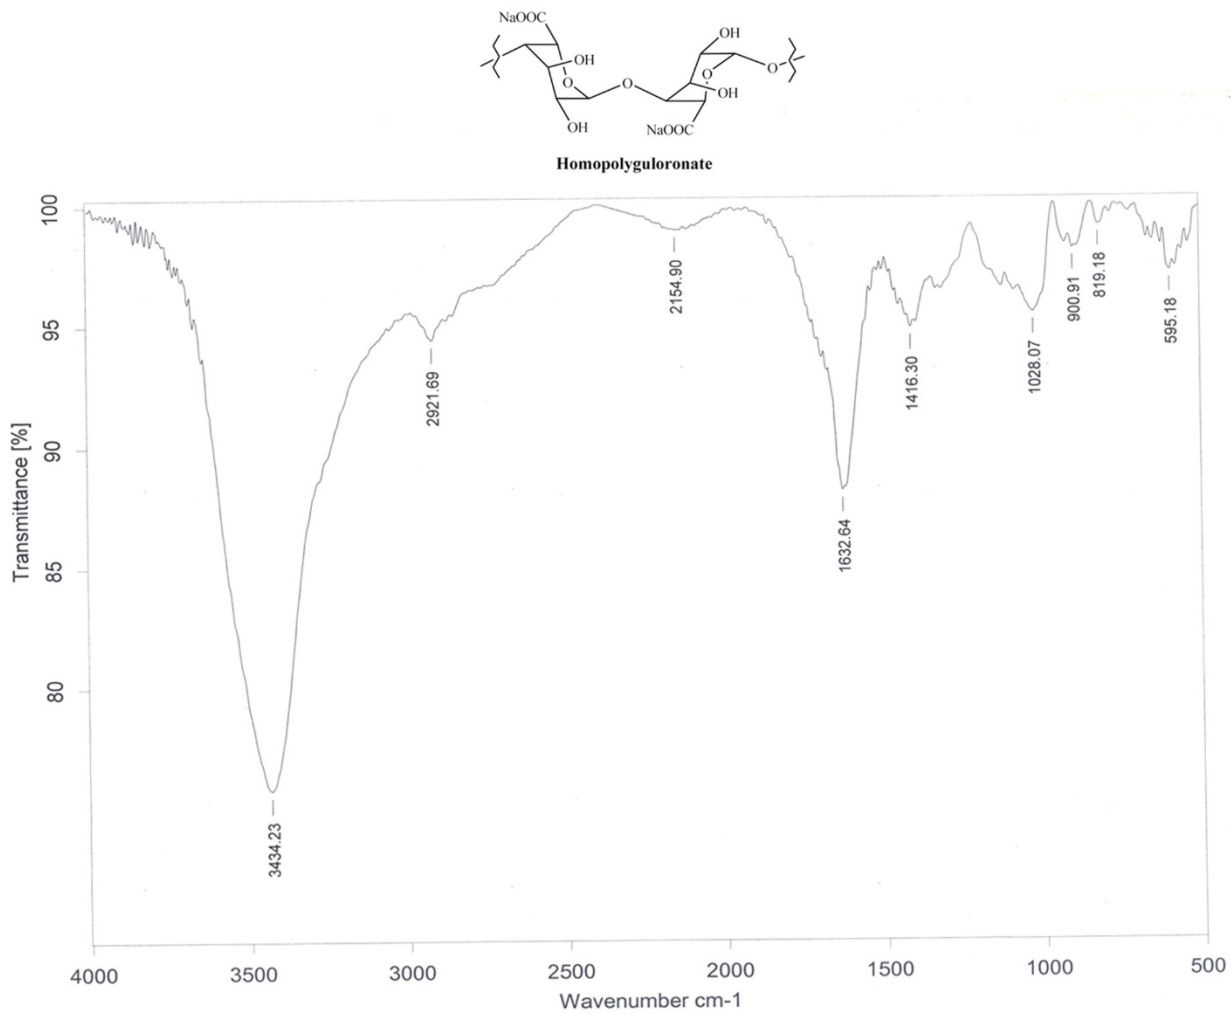

Fig. 4. FT-IR spectrum of the sodium homopolyguluronate.

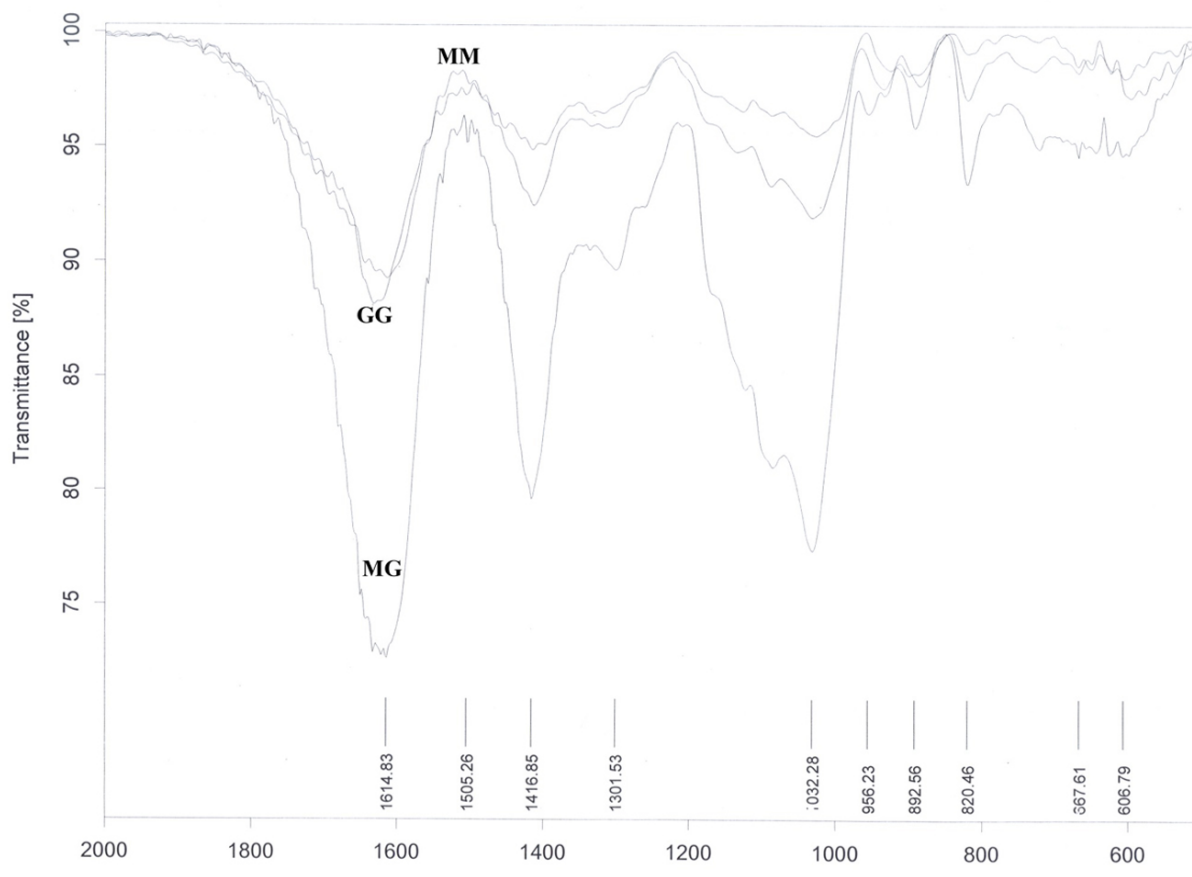

Fig. 5. A comparison between the FT-IR spectra of different constituents of the sodium alginate.

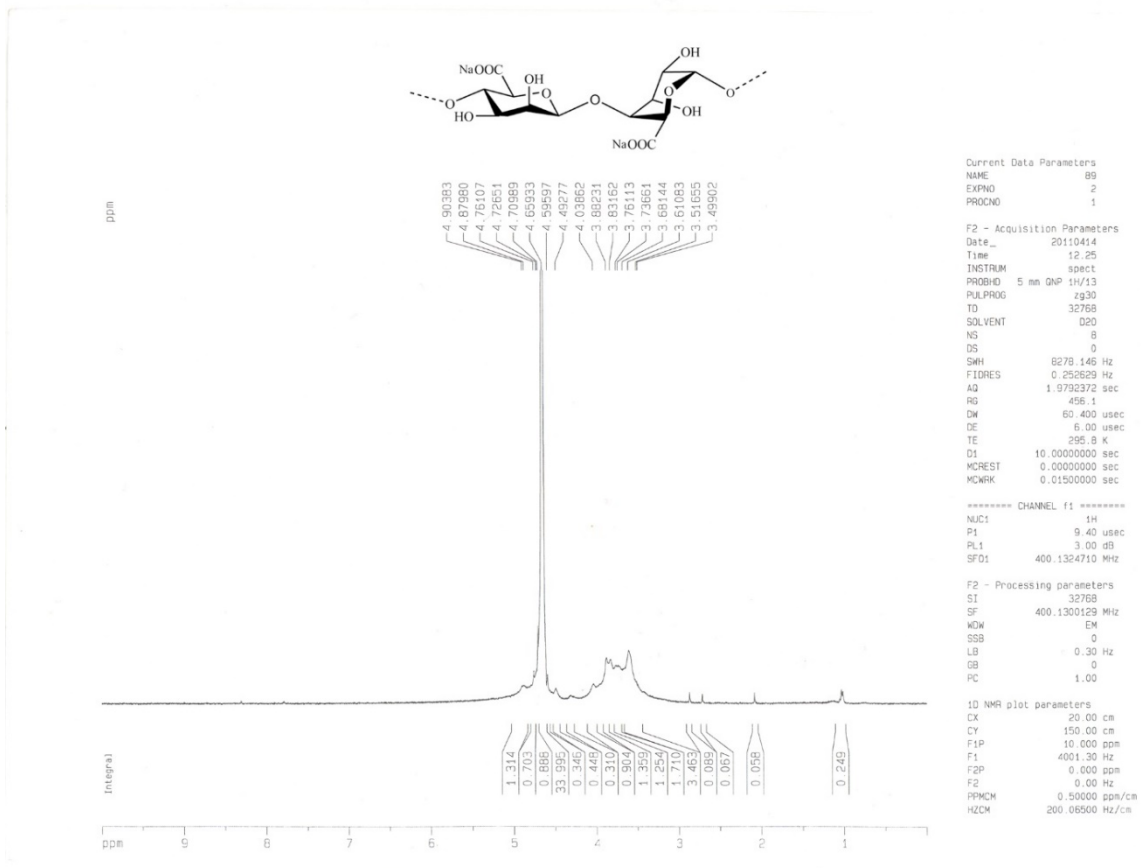

Fig. 6. <sup>1</sup>H NMR spectrum of sodium alginate.

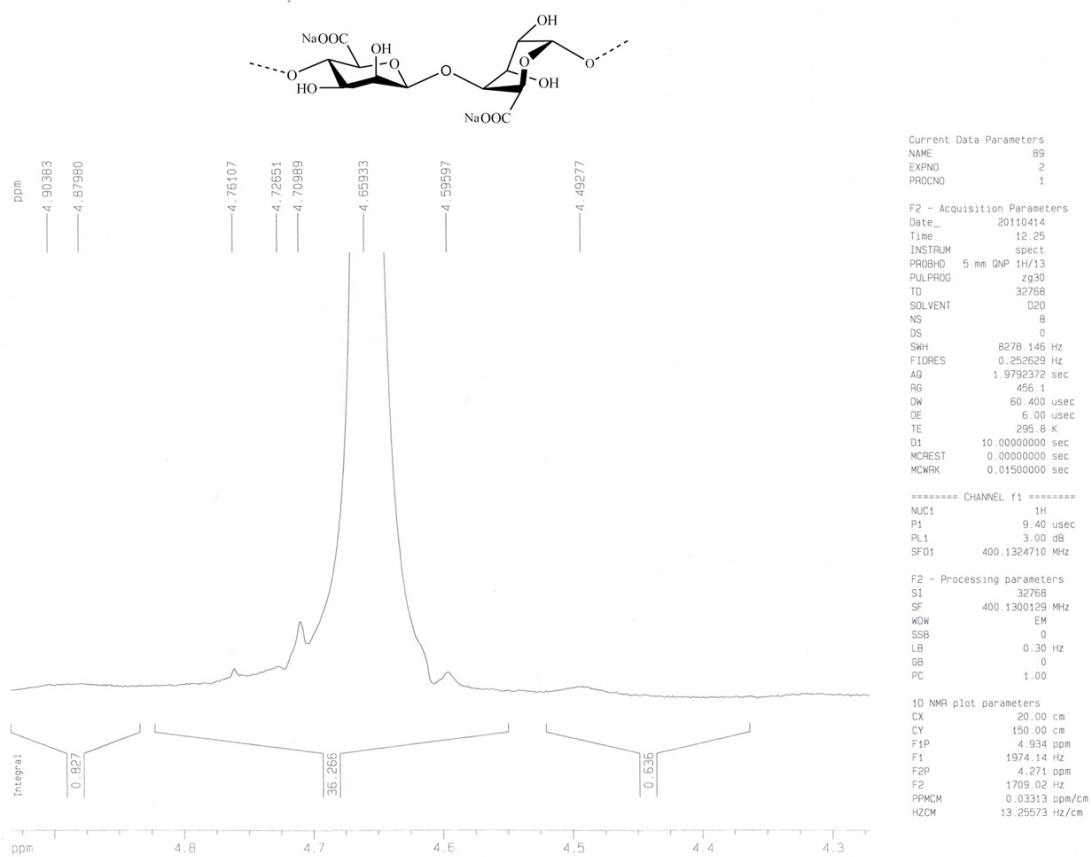

Fig. 7. <sup>1</sup>H NMR spectrum of sodium alginate (Expanded aliphatic region).



### 1.5. Thermo Gravimetric analysis of sodium alginate and alginic acid (1)

As seen in thermograms of sodium alginate and alginic acid, the hydrophilicity of sodium alginate is significantly more than that insoluble form, i.e. alginic acid. Therefore, the insoluble form of alginate is a more appropriate candidate as a bifunctional heterogeneous catalyst compared to its soluble form.

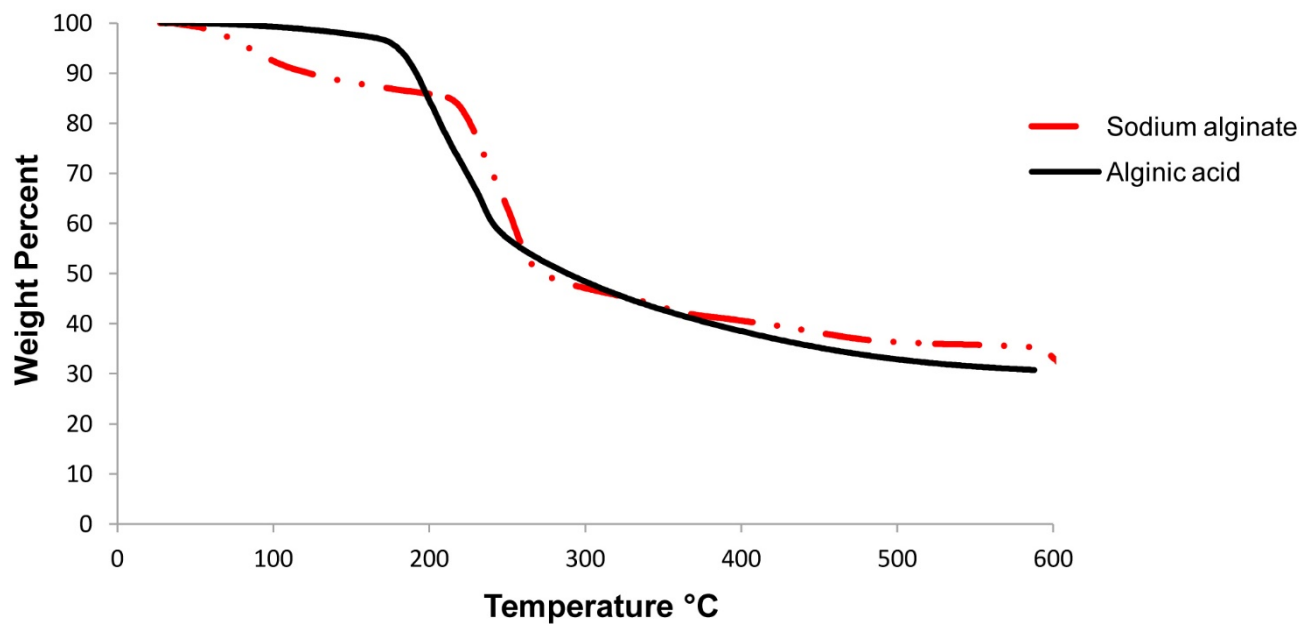

Fig. 8. TGA thermograms of sodium alginate and alginic acid (1).

## 1.6. Chemical characterization of alginic acid (1)

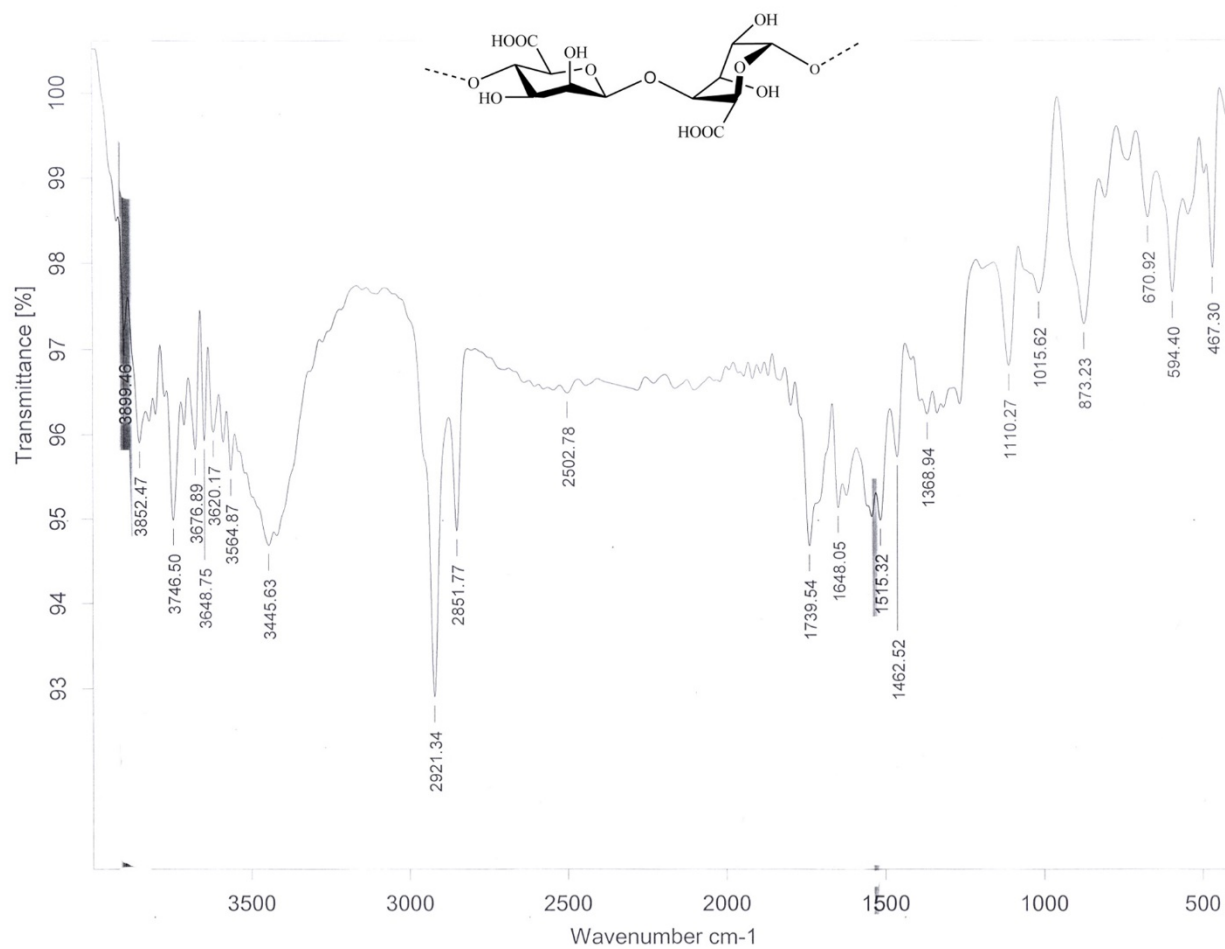

Fig. 9. FT-IR spectrum of prepared alginic acid (1).

### 1.7. General procedure for the synthesis of 1,4-dihydropyridines (5-6) catalyzed by alginic acid (1)

In a 5 mL round bottom flask equipped with a magnetic bar and condenser, a mixture of aldehyde (**2**, 1 mmol),  $\beta$ -ketoester (**3**, 2 mmol), ammonium acetate (**4a**, 1.2 mmol) and alginic acid (**1**, 17.6 mg, 10 mol% relative to the aldehyde) was added to 1 mL of 96% EtOH. The resulting mixture was stirred at reflux conditions for appropriate time indicated in Tables 1 or 2. After completion of the reaction (monitored by TLC), it was diluted with 2 mL of 96% EtOH and filtered. Then, distilled water was added dropwise with continuous stirring to the filtrate to provide crystals of 1,4-DHP **5** or **6**. The separated crystals were filtered off, washed with cold aqueous EtOH (50% v/v, 2 mL) and dried at 60 °C in an air oven for 1 h.

### 1.8. Reusability of alginic acid catalyst (1) for the Hantzsch MCR

The reusability of the catalyst **1** was investigated in the consecutive Hantzsch reaction of 4-chlorobenzaldehyde (**2a**, 1 mmol), ethyl acetoacetate (**3a**, 2 mmol) and ammonium acetate **4a** (1.2 mmol). The reactions were carried out according to the above general procedure for synthesis of 1,4-DHPs **5**. After the first run, which afforded the diethyl 4-(4-chlorophenyl)-2,6-dimethyl-1,4-dihydropyridine-3,5-dicarboxylate (**5a**) in 96% isolated yield (100% conversion), the separated catalyst was washed with fresh aliquot of EtOAc (3 x 1 mL), dried in an air oven at 60 °C, and then was subjected to a second Hantzsch reaction from which it also gave the Hantzsch reaction products in 100% conversion (95% isolated yield); the average chemical yield for six repeated runs was 94%.

**Table 1.** Pseudo-four-component synthesis of different diethyl 1,4-DHP-3,5-dicarboxylate (**5a-p**) catalysed by alginic acid (**1**) in EtOH under reflux conditions<sup>a</sup>

| Entry | Aldehyde <b>2</b>                 | Product <b>5<sup>b</sup></b> | Time (min) | Yield (%) <sup>c</sup> | M.P (Obsd) (°C) | M.P (Ref) (°C) |
|-------|-----------------------------------|------------------------------|------------|------------------------|-----------------|----------------|
| 1     | Formaldehyde<br><b>2a</b>         | <br><b>5a</b><br>(Diludine)  | 25         | 97                     | 177-180         | 183            |
| 2     | 4-Chlorobenzaldehyde<br><b>2b</b> | <br><b>5b</b>                | 50         | 96                     | 144-145         | 145-146        |
| 3     | 4-Fluorobenzaldehyde<br><b>2c</b> | <br><b>5c</b>                | 45         | 97                     | 152-153         | 151-155        |
| 4     | 4-Nitrobenzaldehyde<br><b>2d</b>  | <br><b>5d</b>                | 50         | 83                     | 125-127         | 136            |
| 5     | 3-Nitrobenzaldehyde<br><b>2e</b>  | <br><b>4e</b>                | 60         | 77                     | 166-168         | 163            |
| 6     | 4-Bromobenzaldehyde<br><b>2f</b>  | <br><b>5f</b>                | 35         | 93                     | 162-164         | 162-164        |
| 7     | 2-Chlorobenzaldehyde<br><b>2g</b> | <br><b>5g</b>                | 60         | 86                     | 131-133         | 129-130        |

|    |                                                           |                                                                                     |    |    |         |         |
|----|-----------------------------------------------------------|-------------------------------------------------------------------------------------|----|----|---------|---------|
| 8  | 2,4-Dichlorobenzaldehyde<br><b>2h</b>                     | 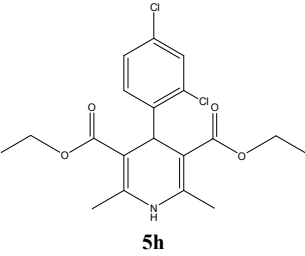   | 65 | 87 | 146-148 | 148-149 |
| 9  | Benzaldehyde<br><b>2i</b>                                 |    | 45 | 96 | 156-158 | 157-159 |
| 10 | 4-Methylbenzaldehyde<br><b>2j</b>                         |    | 60 | 92 | 135-137 | 135-138 |
| 11 | 4-Methoxybenzaldehyde<br><b>2k</b>                        |   | 70 | 91 | 160-161 | 158-160 |
| 12 | 4-Hydroxybenzaldehyde<br><b>2l</b>                        |  | 90 | 92 | 228-231 | 229-231 |
| 13 | 4-Hydroxy-3-methoxybenzaldehyde<br>(Vanilin)<br><b>2m</b> |  | 80 | 90 | 160-162 | 160-164 |
| 14 | Furfural<br><b>2n</b>                                     |  | 55 | 93 | 160-161 | 160-161 |
| 15 | Thiophen-2-carbaldehyde<br><b>2o</b>                      |  | 70 | 98 | 169-171 | 172-174 |

16

Cinnamaldehyde  
**2p**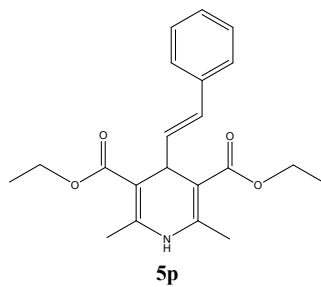

60

94

145-147

147

<sup>a</sup> Reaction conditions: Aldehyde (**2a**, 1 mmol), ethyl acetoacetate (**3a**, 2 mmol), ammonium acetate (**4a**, 1.2 mmol). <sup>b</sup> All the products are known compounds and were identified by comparison of their TLC, physical and spectral (IR, <sup>1</sup>H NMR) data with those of authentic samples. <sup>c</sup> Isolated yields.

**Table 2.** Pseudo-four-component synthesis of different dimethyl 1,4-DHP-3,5-dicarboxylate (**6a-p**) catalysed by alginic acid (**1**) in EtOH under reflux conditions<sup>a</sup>

| Entry | Aldehyde <b>2</b>                     | Product <b>6<sup>b</sup></b>                                                                     | Time (min) | Yield (%) <sup>c</sup> | M.P (Obsd) (°C) | M.P (ref) (°C) |
|-------|---------------------------------------|--------------------------------------------------------------------------------------------------|------------|------------------------|-----------------|----------------|
| 1     | Formaldehyde<br><b>2a</b>             | 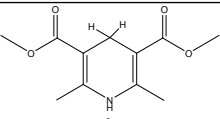<br><b>6a</b>   | 20         | 96                     | 220-222         | 222-224        |
| 2     | 4-Chlorobenzaldehyde<br><b>2b</b>     | <br><b>6b</b>   | 50         | 94                     | 196-198         | 196-198        |
| 3     | 4-Fluorobenzaldehyde<br><b>2c</b>     | <br><b>6c</b>   | 40         | 97                     | 171-172         | 176-179        |
| 4     | 4-Nitrobenzaldehyde<br><b>2d</b>      | <br><b>6d</b>   | 60         | 85                     | 196-198         | 196-198        |
| 5     | 3-Nitrobenzaldehyde<br><b>2e</b>      | <br><b>6e</b>  | 50         | 79                     | 210-211         | 210-212        |
| 6     | 4-Bromobenzaldehyde<br><b>2f</b>      | <br><b>6f</b> | 30         | 94                     | 201-202         | 200-202        |
| 7     | 2-Chlorobenzaldehyde<br><b>2g</b>     | <br><b>6g</b> | 60         | 88                     | 184-185         | 185-186        |
| 8     | 2,4-Dichlorobenzaldehyde<br><b>2h</b> | <br><b>6h</b> | 70         | 93                     | 188-190         | 190-192        |

|    |                                                           |                                                                                     |    |    |         |         |
|----|-----------------------------------------------------------|-------------------------------------------------------------------------------------|----|----|---------|---------|
| 9  | Benzaldehyde<br><b>2i</b>                                 | 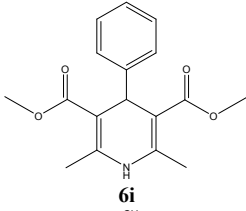   | 40 | 95 | 193-194 | 197-198 |
| 10 | 4-Methylbenzaldehyde<br><b>2j</b>                         |    | 55 | 93 | 175-177 | 173-175 |
| 11 | 4-Methoxybenzaldehyde<br><b>2k</b>                        |    | 70 | 92 | 188-191 | 186-188 |
| 12 | 4-Hydroxybenzaldehyde<br><b>2l</b>                        |   | 80 | 90 | 230-232 | 230-232 |
| 13 | 4-Hydroxy-3-methoxybenzaldehyde<br>(Vanilin)<br><b>2m</b> |  | 80 | 91 | 210-213 | 213     |
| 14 | Furfural<br><b>2n</b>                                     |  | 50 | 92 | 191-193 | 192-194 |
| 15 | Thiophen-2-carbaldehyde<br><b>2o</b>                      |  | 60 | 97 | 200-201 | 201-203 |
| 16 | Cinnamaldehyde<br><b>2p</b>                               |  | 50 | 93 | 174-175 | 176-178 |

<sup>a</sup> Reaction conditions: Aldehyde (**2a**, 1 mmol), methyl acetoacetate (**3b**, 2 mmol), ammonium acetate (**4a**, 1.2 mmol). <sup>b</sup> All the products are known compounds and were identified by comparison of their TLC, physical and spectral (IR, <sup>1</sup>H NMR) data with those of authentic samples. <sup>c</sup> Isolated yields.



**References:** (a) S. Ghosh, F. Saikh, J. Das, A. K. Pramanik, *Tetrahedron Lett.* **2013**, *54*, 58–62; (b) B. S. Furniss, A. J. Hannaford, P. W. G. Smith, Text book of Practical Organic Chemistry, 5th ed.; Singapore: Longman Singapore, 1994. p. 1168; (c) J. Jacques, V. Eynde, F. Delfaese, A. Mayence, Y. V. Haverbeke, *Tetrahedron* **1995**, *51*, 6511–6516; (d) B. Leov, K. M. Snader, *J. Org. Chem.* **1965**, *30*, 1914–1916; (e) B. Leov, K. M. S. Lakshmi, *Bioorg. Med. Chem. Lett.* **2012**, *22*, 6016–6023; (f) P. P. Ghosh, P. Mukherjee, A. R. Das, *RSC Adv.* **2013**, *3*, 8220–8226; (g) M. Nasr-Esfahani, S. J. Hoseini, M. Montazerzohori, R. Mehrabi, H. Nasrabadi, *J. Mol. Catal. A: Chem.* **2014**, *382*, 99–105; (h) A. Debache, W. Ghalem, R. Boulcina, A. Belfaitah, S. Rhouatiand, B. Carboni, *Tetrahedron Lett.* **2009**, *50*, 5248–5250; (i) S. Patil, P. B. Pawar, S. D. Jadhav, M. B. Deshmukh, *Asian J. Chem.* **2013**, *25*, 9442–9446; (j) A. Shaabani, A. H. Rezayanand, A. Rahmati, M. Sharifi, *Monatsh. Chem.* **2006**, *137*, 77–81; (k) P. Kaur, H. Sharma, R. Rana, D.N. Prasad, R. K. Singh, *Asian J. Chem.* **2012**, *24*, 5649–5651; (l) R. H. Boecker, F. P. Guengerich, *J. Med. Chem.* **1986**, *29*, 1596–1603; (m) J. L. Wang, B. K. Liu, C. Yin, Q. Wu, X. F. Lin, *Tetrahedron* **2011**, *67*, 2689–2692; (n) B. M. Khadilkar, V. G Gaikar, A. A. Chitnavis, *Tetrahedron Lett.* **1995**, *36*, 8083–8086; (o) K. Rajesh, B. P. Reddy, V. Vijayakumar, *Can. J. Chem.* **2011**, *89*, 1236–1244; (p) H. Salehi, Q. X. Guo, *Synthetic Commun.* **2004**, *34*, 4349–4357.

## Chemical characterization of diethyl 1,4-dihydro-2,6-dimethyl-4-(thiophen-2-yl)pyridine-3,5-dicarboxylate (**5o**)

Yellowish white crystals, mp 167–169 °C, yield: 98%, IR (KBr)  $\text{cm}^{-1}$ : 3344, 3099, 2925, 2853, 1693, 1655, 1487, 1369, 1300, 1211, 1128, 1093, 854, 721,  $^1\text{H}$  NMR (250 MHz,  $\text{CDCl}_3$ ):  $\delta$  (ppm): 1.29 (t,  $J=7.1$  Hz, 6H), 2.36 (s, 6H), 4.20 (m, 4H), 5.36 (s, 1H, C-H<sub>benzylic</sub>), 5.77 (brs, 1H, N-H), 6.81–6.82 (d,  $J=3.5$  Hz, 1H), 6.85–6.88 (t,  $J=5.0$  Hz, 1H), 7.06–7.08 (dd,  $J=5.0$  Hz,  $J=1.2$  Hz, 1H);  $^{13}\text{C}$  NMR ( $\text{CDCl}_3$ , 75 MHz)  $\delta$  (ppm): 15.9, 20.4, 32.8, 61.2, 101.3, 105.1, 111.6, 141.0, 145.9, 159.4, 166.6.

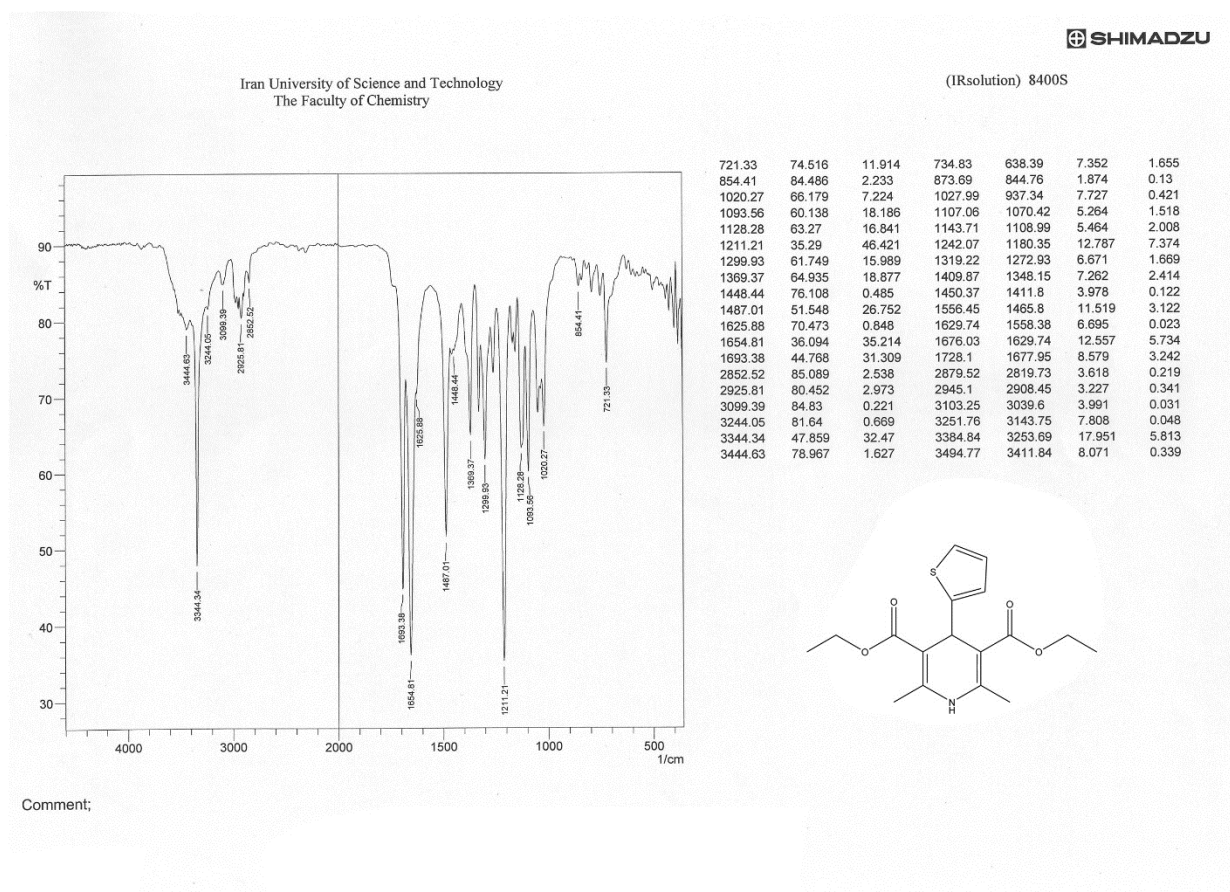

Fig. 10. FTIR spectrum of diethyl 1,4-dihydro-2,6-dimethyl-4-(thiophen-2-yl)pyridine-3,5-dicarboxylate (**5o**).

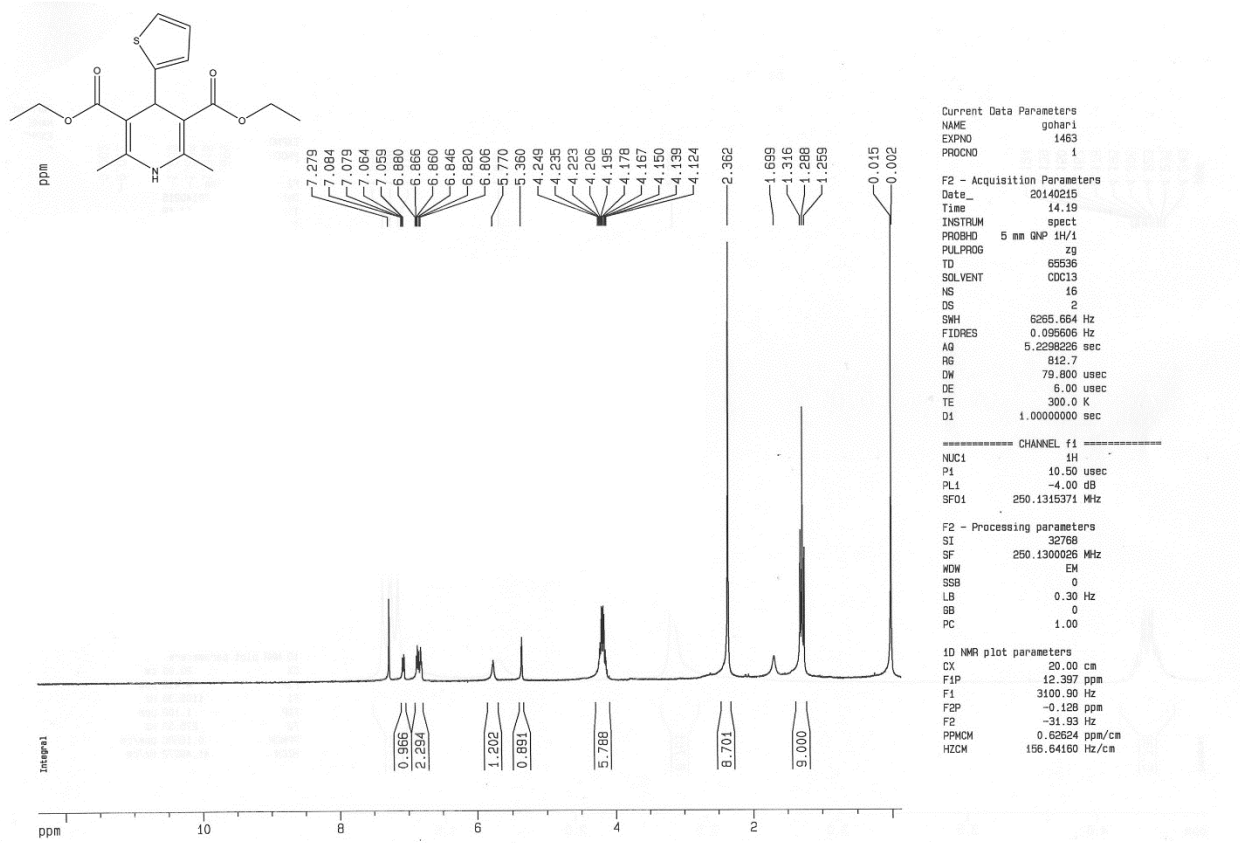

Fig. 11. <sup>1</sup>H NMR spectrum of diethyl 1,4-dihydro-2,6-dimethyl-4-(thiophen-2-yl)pyridine-3,5-dicarboxylate (**50**) in CDCl<sub>3</sub>.

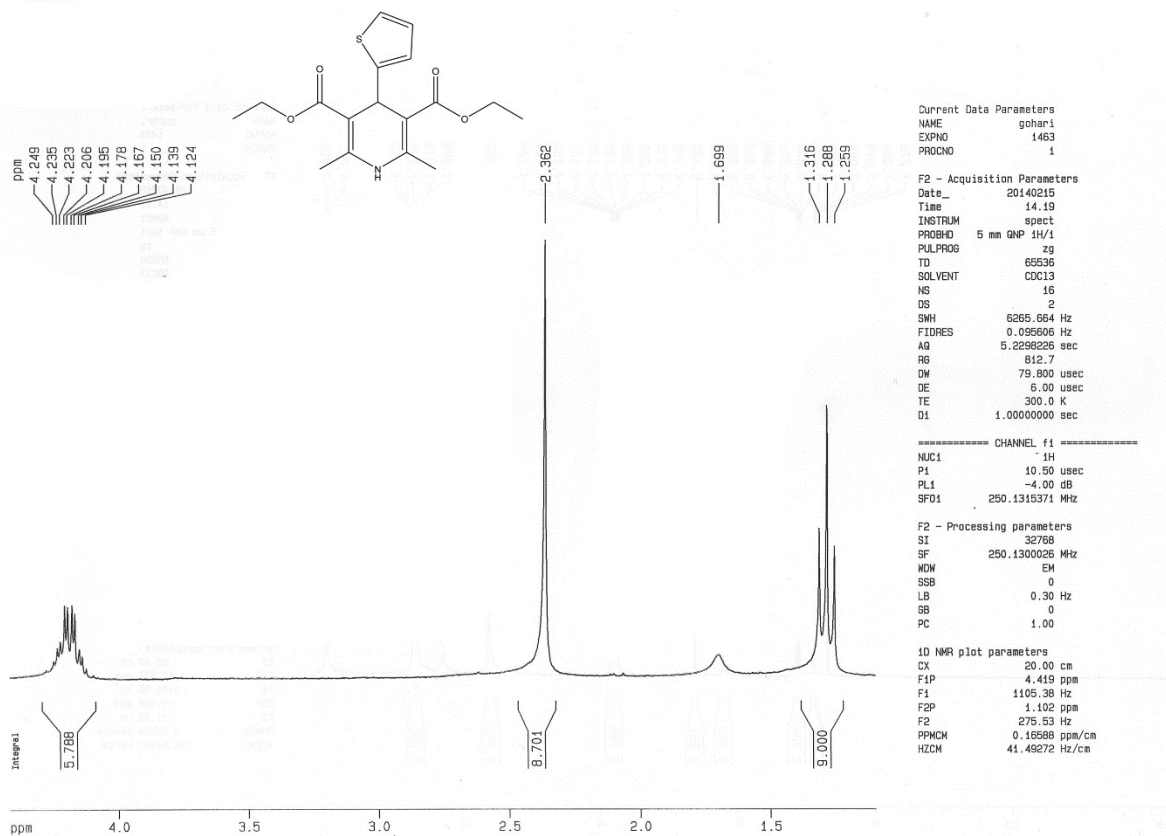

Fig. 12.  $^1\text{H}$  NMR spectrum of diethyl 1,4-dihydro-2,6-dimethyl-4-(thiophen-2-yl)pyridine-3,5-dicarboxylate (**5o**) in  $\text{CDCl}_3$  (Expanded aliphatic region).

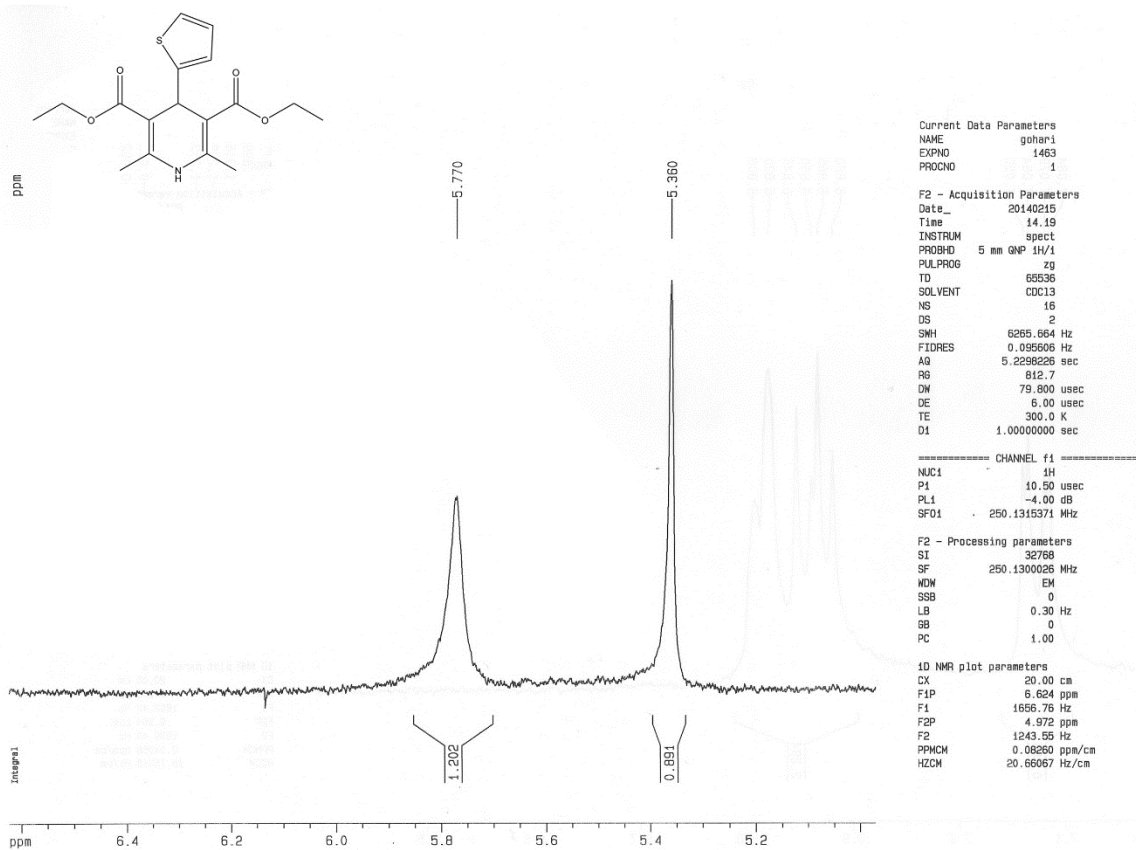

Fig. 13.  $^1\text{H}$  NMR spectrum of diethyl 1,4-dihydro-2,6-dimethyl-4-(thiophen-2-yl)pyridine-3,5-dicarboxylate (**5o**) in  $\text{CDCl}_3$  (Expanded aliphatic region).

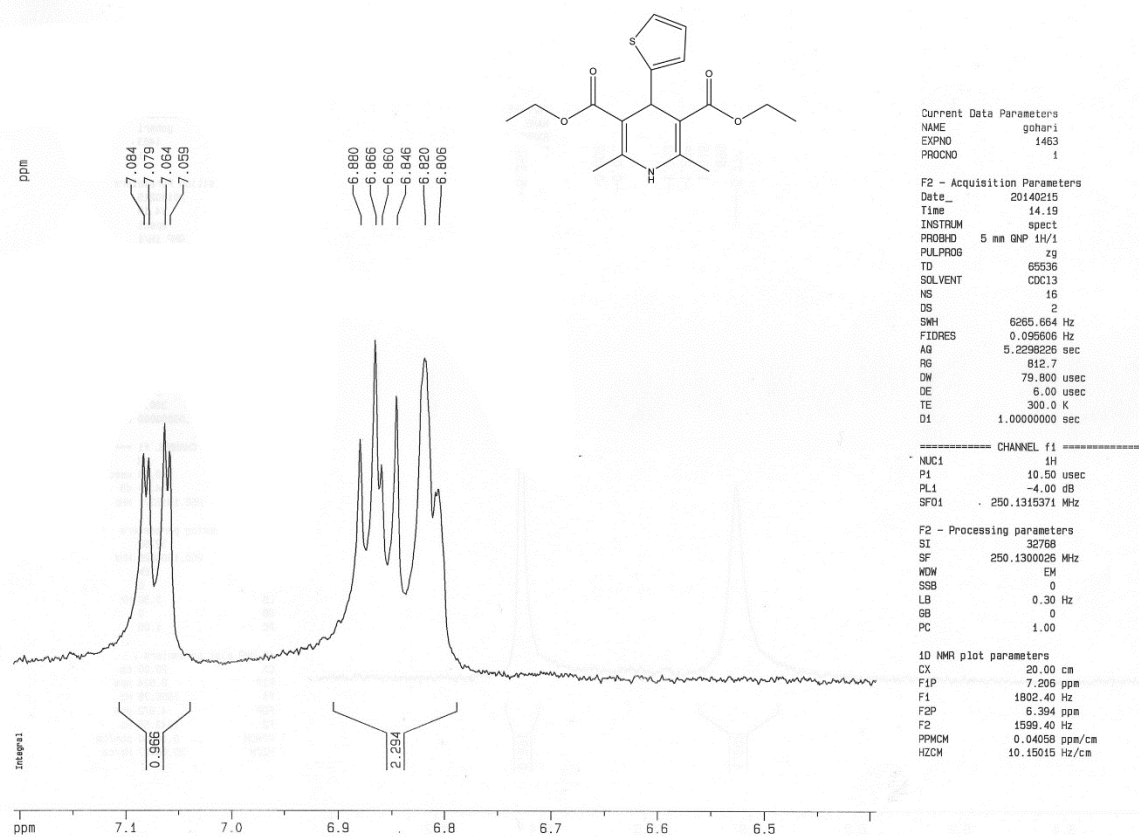

Fig. 14.  $^1\text{H}$  NMR spectrum of diethyl 1,4-dihydro-2,6-dimethyl-4-(thiophen-2-yl)pyridine-3,5-dicarboxylate (**5**) in  $\text{CDCl}_3$  (Expanded aromatic region).

## Chemical characterization of diethyl 2,6-dimethyl-4-styrylpyridine-1,4-dihydro-3,5-dicarboxylate (**5p**)

Yellow crystals, mp 145–147 °C, yield: 94%, IR (KBr)  $\text{cm}^{-1}$ : 3432, 3336, 3244, 3097, 2980, 2320, 1690, 1645, 1491, 1446, 1373, 1327, 1298, 1220, 1120, 749,  $^1\text{H}$  NMR (250 MHz,  $\text{CDCl}_3$ )  $\delta$  (ppm): 1.31 (t,  $J=7.0$  Hz, 6H), 2.35 (s, 6H), 4.20 (m, 4H), 4.64 (d,  $J=6.0$  Hz, 1H, C-H<sub>benzylic</sub>), 5.62 (brs, 1H, N-H), 6.16- 6.29 (m, 2H), 7.14–7.36 (m, 5H),  $^{13}\text{C}$  NMR ( $\text{CDCl}_3$ , 75 MHz)  $\delta$  (ppm): 14.5, 19.2, 37.1, 58.1, 102.6, 119.3, 120.2, 127.5, 128.8, 130.9, 133.0, 136.4, 147.7, 169.2.

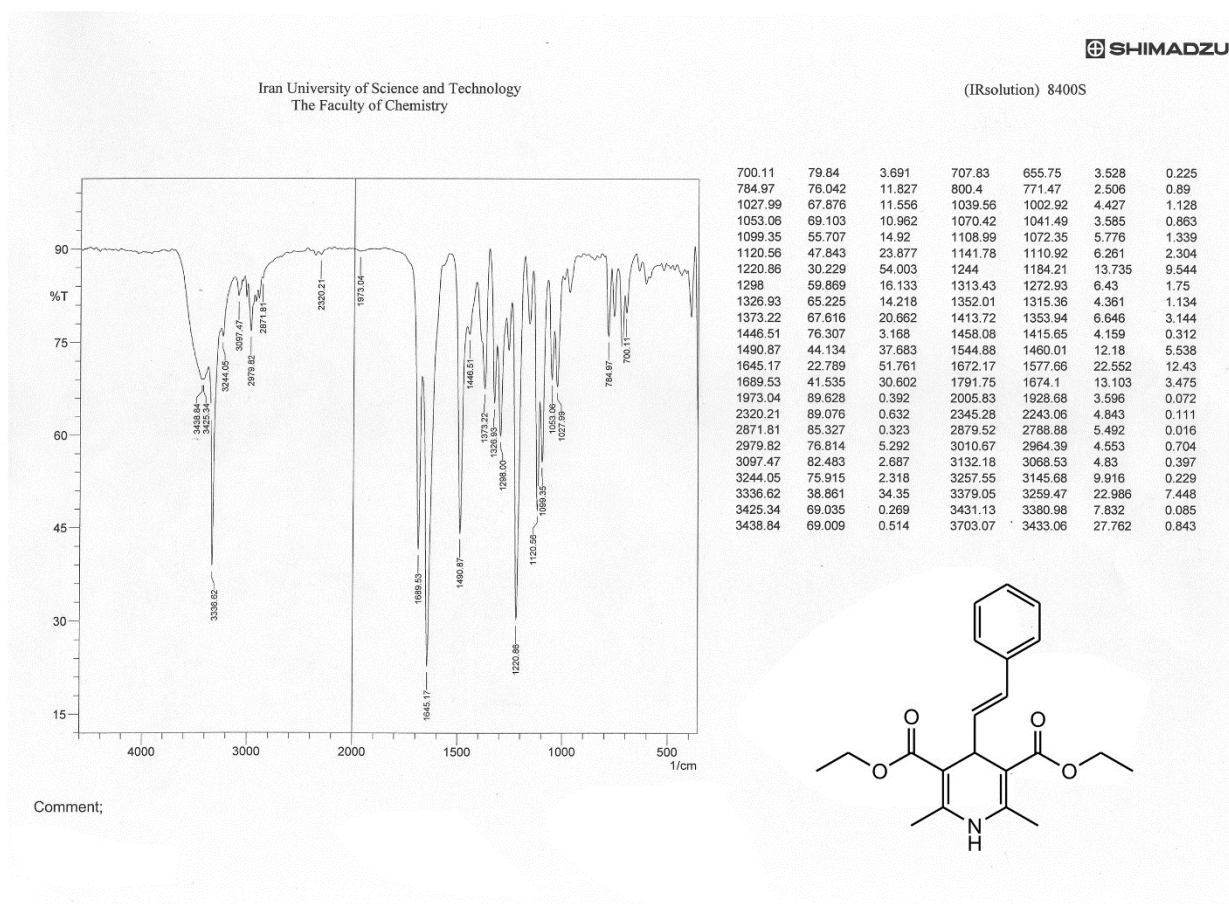

Fig. 15. FT-IR spectrum of diethyl 2,6-dimethyl-4-styrylpyridine-1,4-dihydro-3,5-dicarboxylate (**5p**).

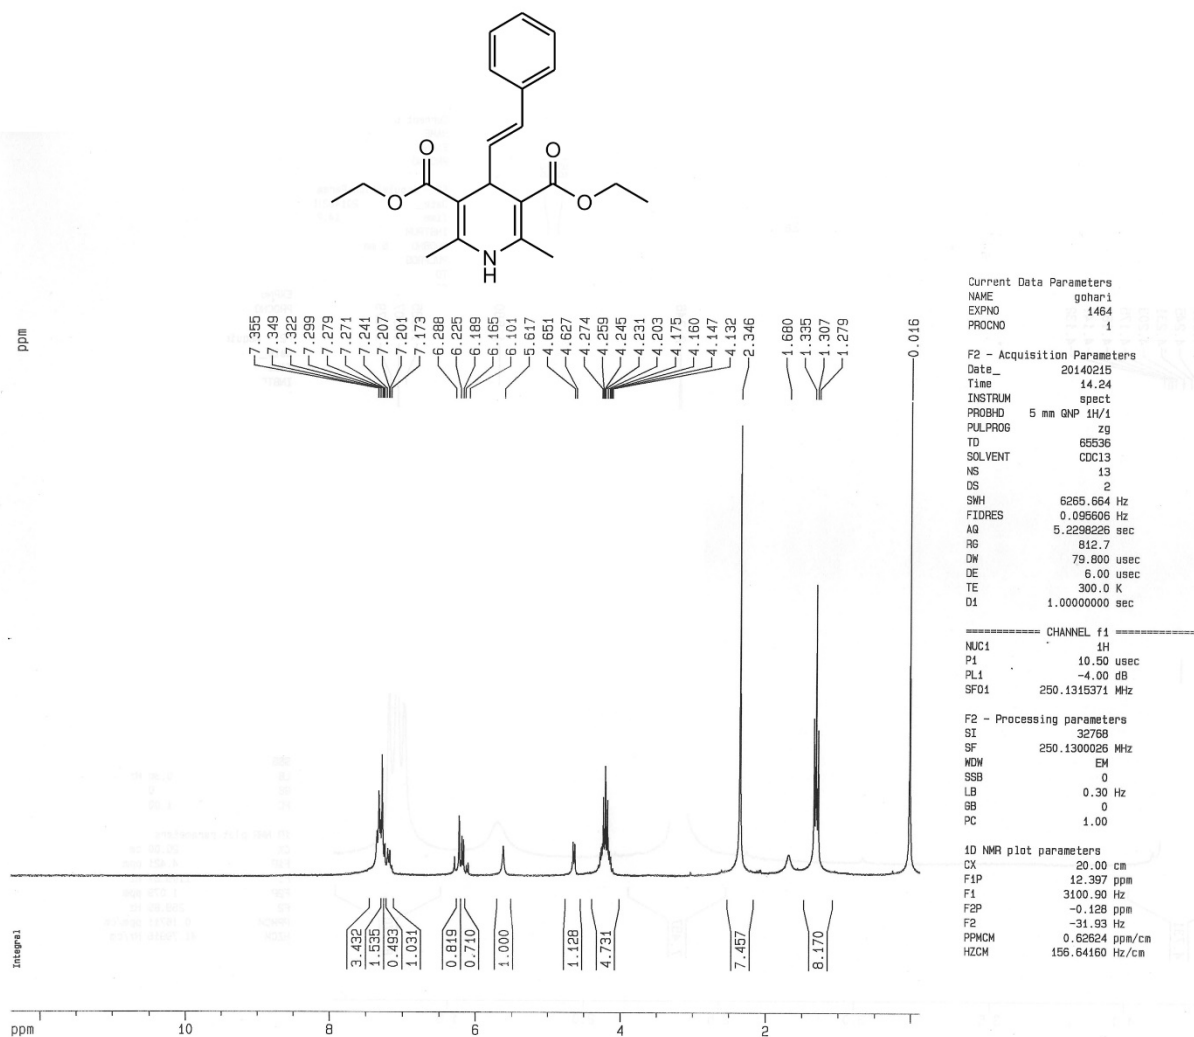

Fig. 16.  $^1\text{H}$  NMR spectrum of diethyl 2,6-dimethyl-4-styrylpyridine-1,4-dihydro-3,5-dicarboxylate (**5p**) in  $\text{CDCl}_3$ .



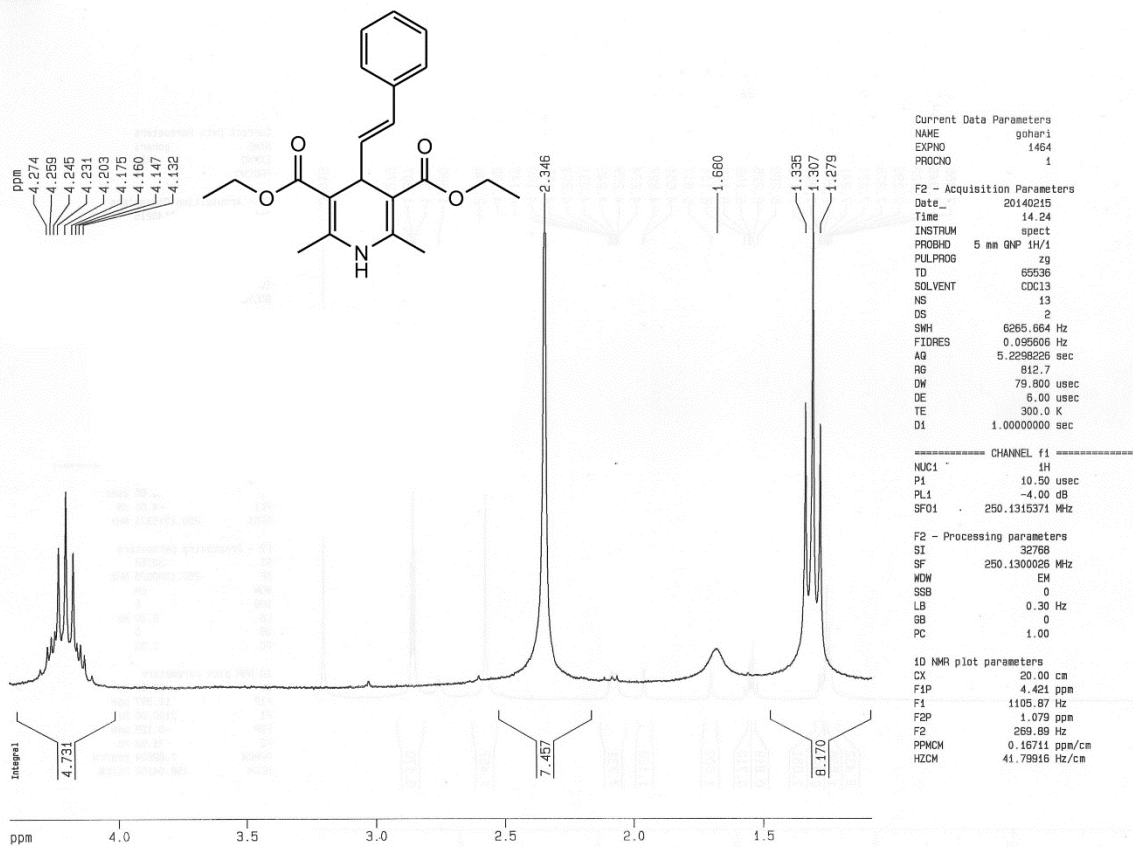

Fig. 17.  $^1\text{H}$  NMR spectrum of diethyl 2,6-dimethyl-4-styrylpyridine-1,4-dihydro-3,5-dicarboxylate (**5p**) in  $\text{CDCl}_3$  (Expanded aliphatic region).

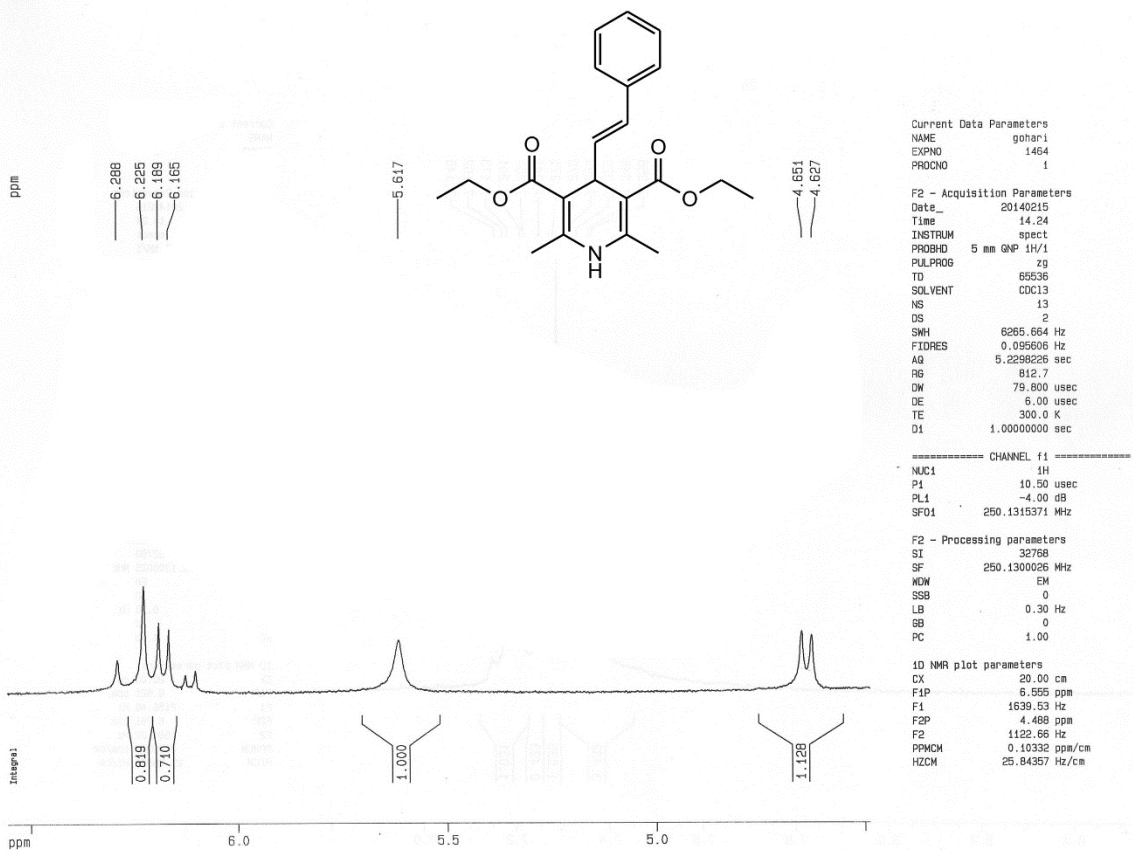

Fig. 18.  $^1\text{H}$  NMR spectrum of diethyl 2,6-dimethyl-4-styrylpyridine-1,4-dihydro-3,5-dicarboxylate (**5p**) in  $\text{CDCl}_3$  (Expanded aliphatic region).

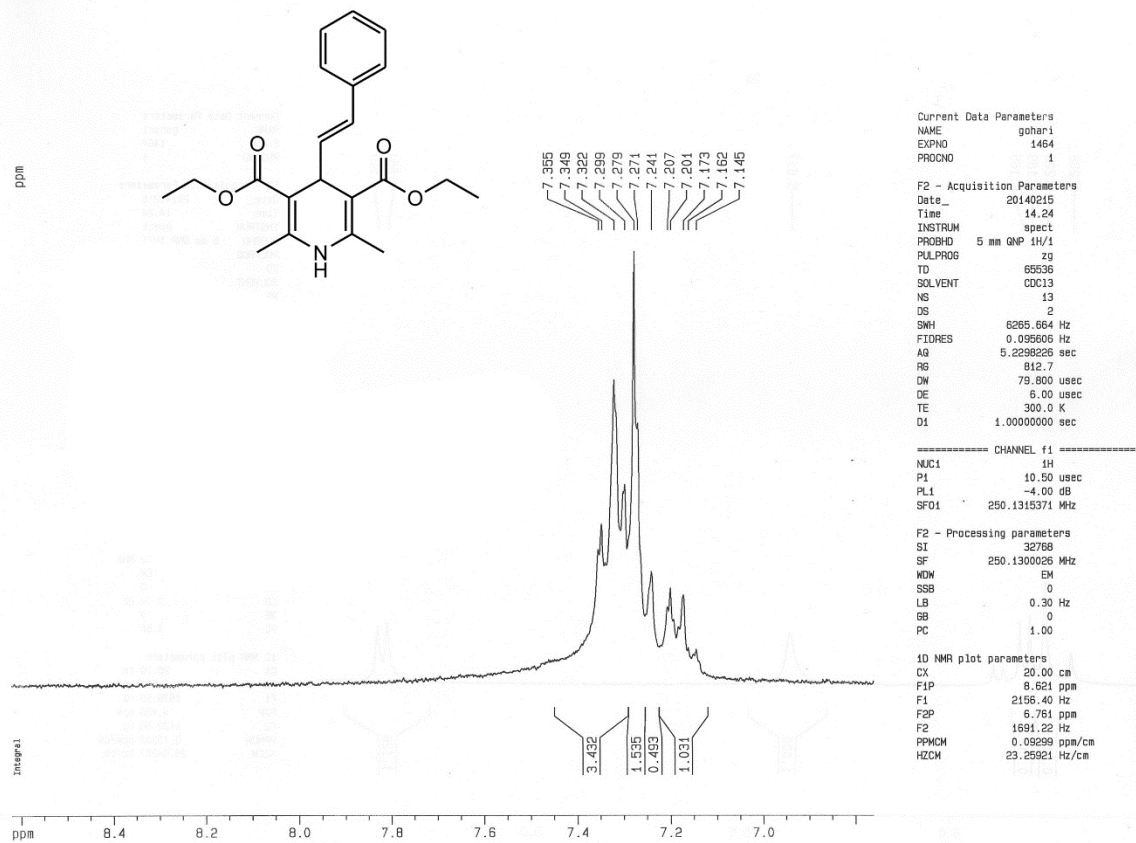

Fig. 19. <sup>1</sup>H NMR spectrum of diethyl 2,6-dimethyl-4-styrylpyridine-1,4-dihydro-3,5-dicarboxylate (**5p**) in CDCl<sub>3</sub> (Expanded aromatic region)

## Chemical characterization of dimethyl 4-(4-chlorophenyl)-2,6-dimethyl-1,4-dihydropyridine-3,5-dicarboxylate (6b)

Yellowish white crystals, mp 160–162 °C, yield: 90%, IR (KBr)  $\text{cm}^{-1}$ : 3336, 3097, 2923, 1699, 1651, 1487, 1434, 1305, 1213, 1184, 1099, 1018, 845, 750,  $^1\text{H}$  NMR (250 MHz,  $\text{CDCl}_3$ ):  $\delta$  (ppm): 2.36 (s, 6H), 3.66 (s, 6H), 4.98 (s, 1H,  $\text{C-H}_{\text{benzylic}}$ ), 5.63 (brs, 1H, N-H), 7.20–7.24 (d, 4H);  $^{13}\text{C}$  NMR ( $\text{CDCl}_3$ , 75 MHz)  $\delta$  (ppm): 20.1, 31.4, 39.9, 114.5, 127.7, 129.2, 131.1, 144.9, 195.1.

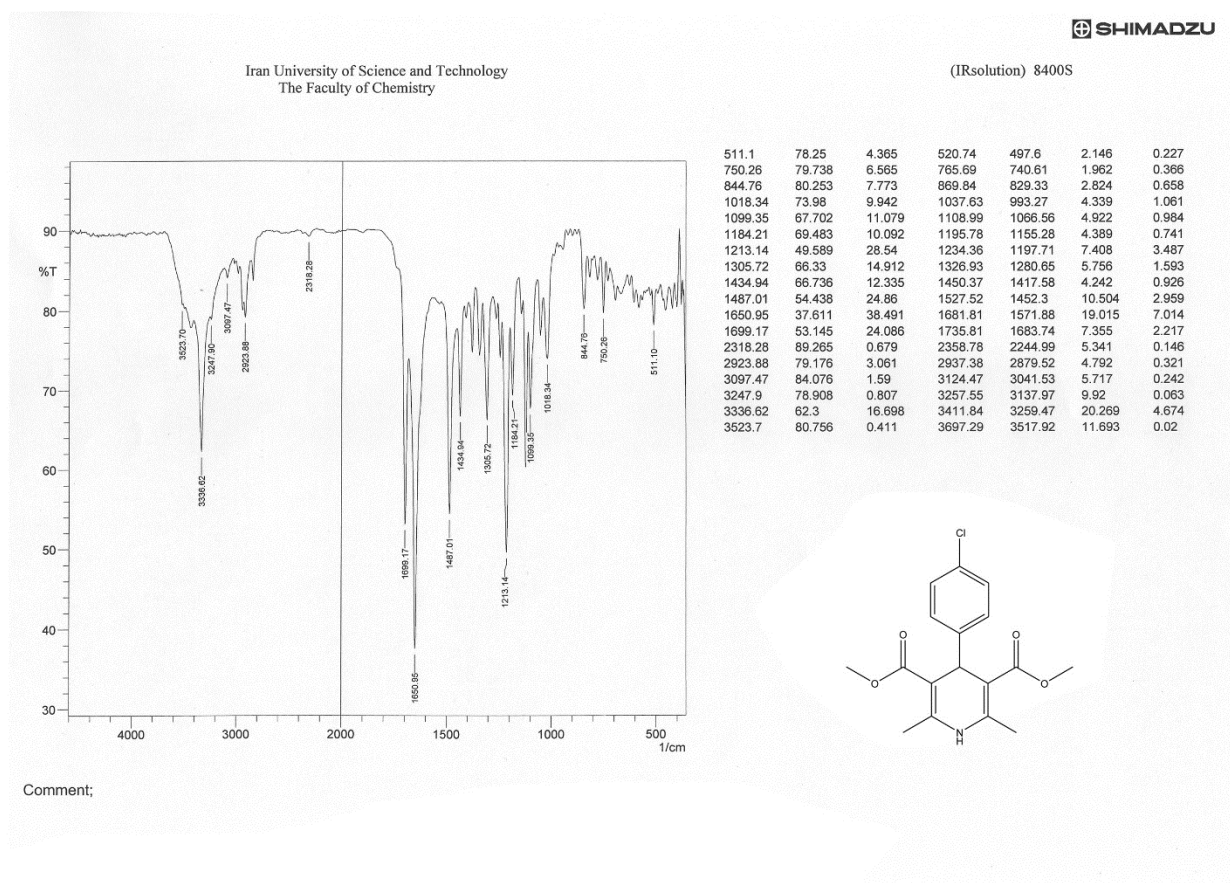

Fig. 20. FTIR spectrum of dimethyl 4-(4-chlorophenyl)-2,6-dimethyl-1,4-dihydropyridine-3,5-dicarboxylate (6b).

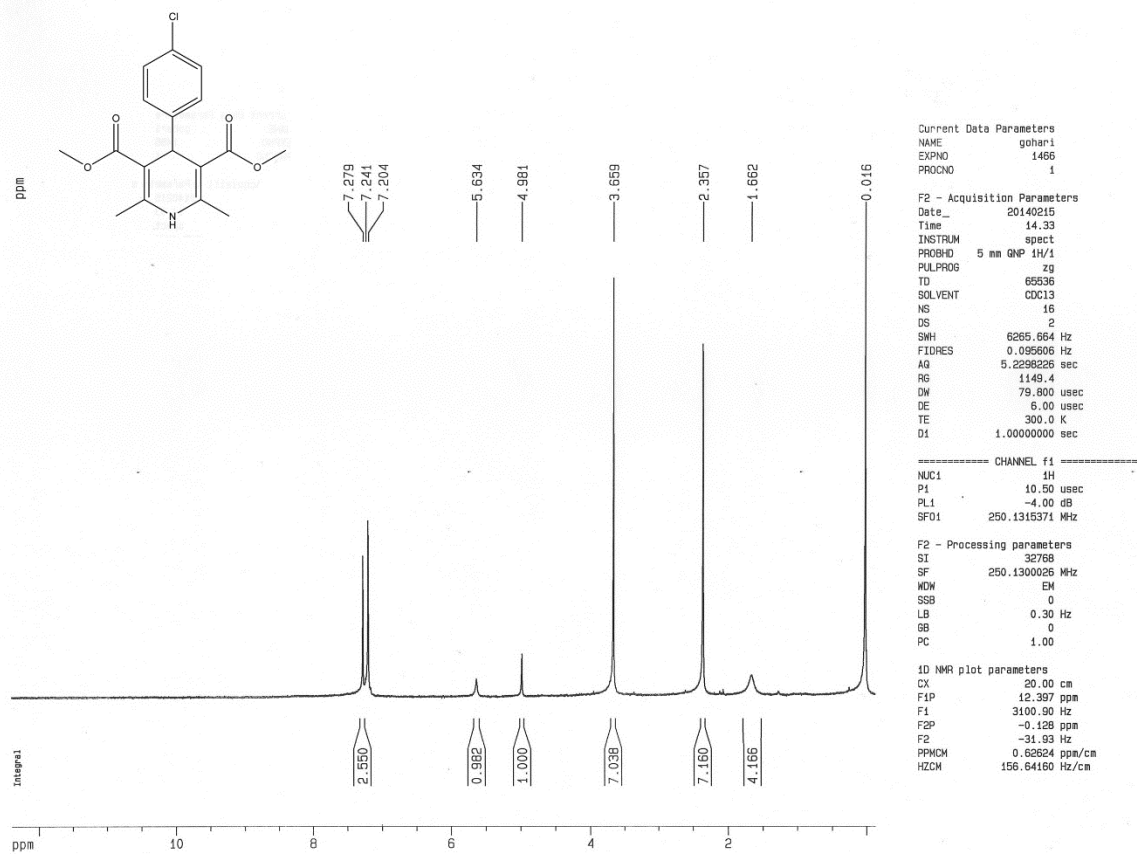

Fig. 21. <sup>1</sup>H NMR spectrum of dimethyl 4-(4-chlorophenyl)-2,6-dimethyl-1,4-dihydropyridine-3,5-dicarboxylate (**6b**) in CDCl<sub>3</sub>.

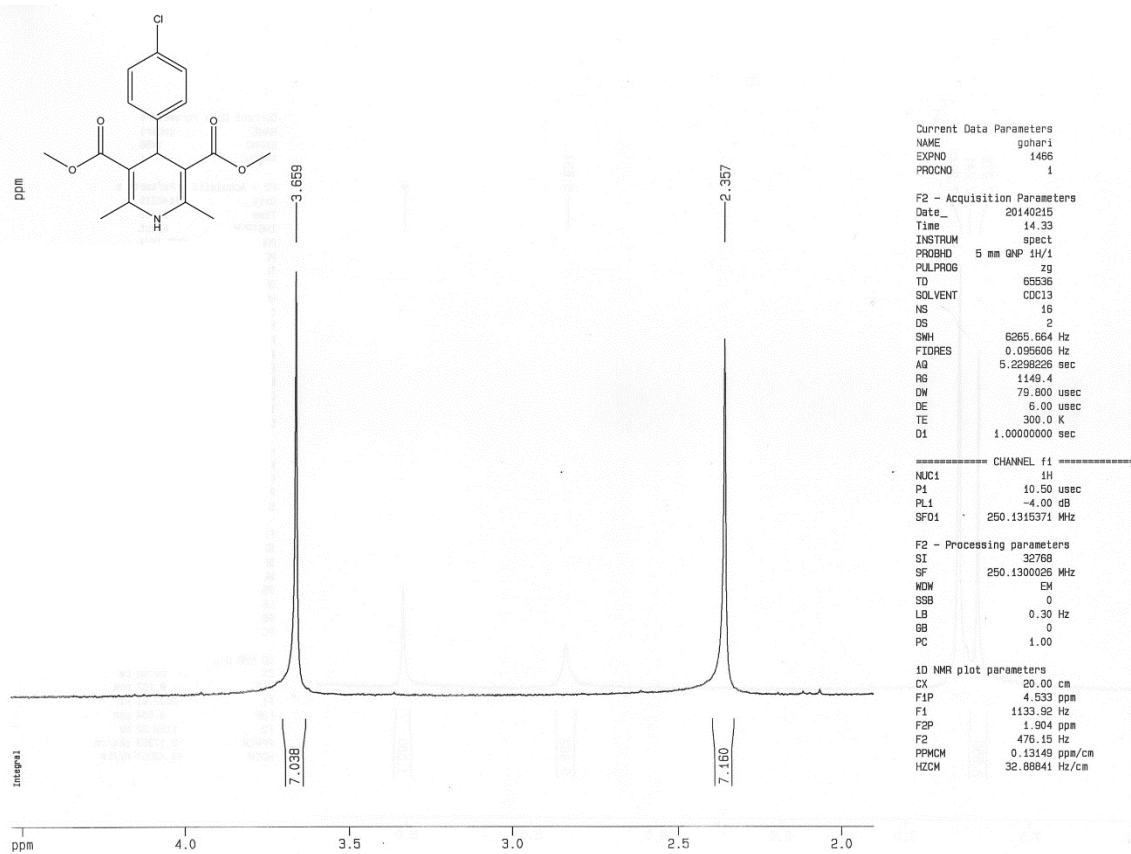

Fig. 22.  $^1\text{H}$  NMR spectrum of dimethyl 4-(4-chlorophenyl)-2,6-dimethyl-1,4-dihydropyridine-3,5-dicarboxylate (**6b**) in  $\text{CDCl}_3$  (Expanded aliphatic region).

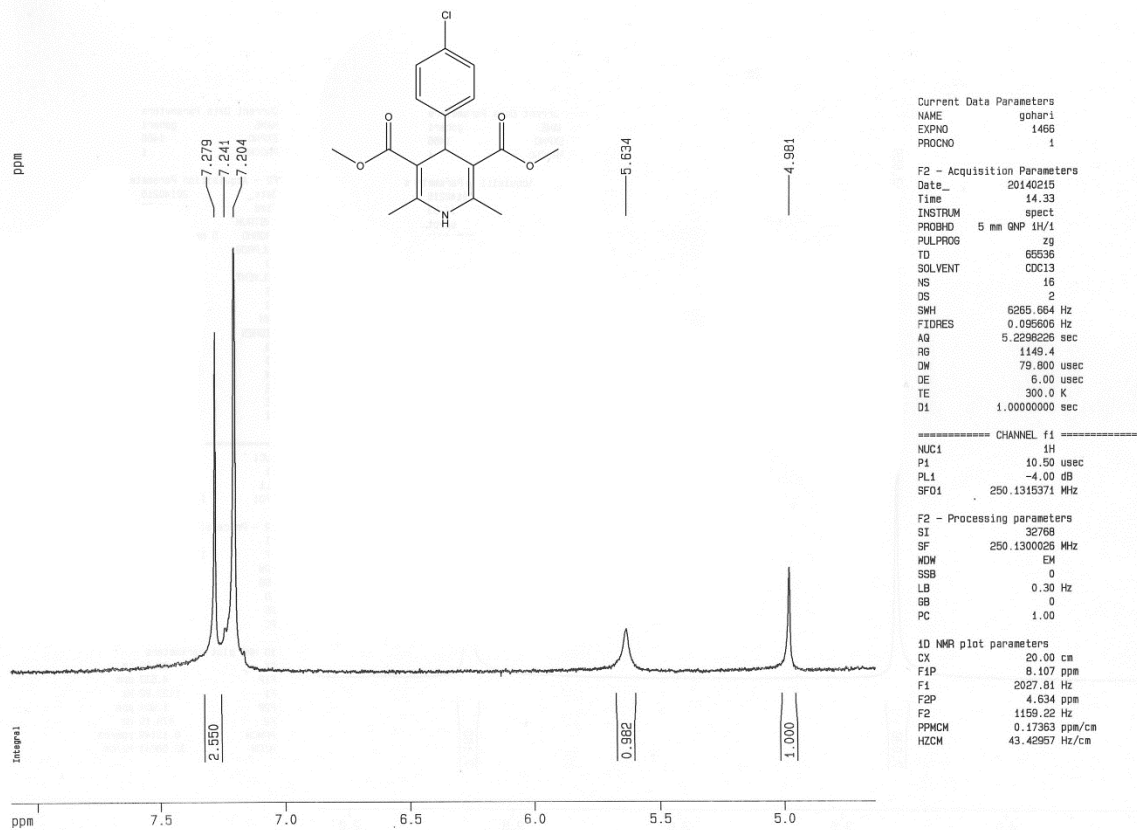

Fig. 23.  $^1\text{H}$  NMR spectrum of dimethyl 4-(4-chlorophenyl)-2,6-dimethyl-1,4-dihydropyridine-3,5-dicarboxylate (**6b**) in  $\text{CDCl}_3$  (Expanded aromatic region).
